# Supplementary material
Source: Royal Society of Chemistry journal article supplement (doi:10.1039/d6ja00052e)
Supplement: d6ja00052e1.pdf [file d6ja00052e1.pdf]

## **Sensitive Determination of Biologically Important Transition Metals by ICP-QMS Using Micro-ultrasonic Single Droplet Nebulization**

Yang Yu<sup>1</sup>, Junhang Dong<sup>1,5</sup>, Baoliang Zhong<sup>3\*</sup>, Xiaoqing Jin<sup>4</sup>, Zhujun Dai<sup>1</sup>, Linjie Chen<sup>1</sup>, Yu  
Li<sup>2</sup>, Jing Chen<sup>3\*</sup>, Huan Tian<sup>2</sup>, Hongtao Zheng<sup>2</sup>, Xing Liu<sup>1</sup>, and Zhenli Zhu<sup>1,2,\*</sup>

<sup>1</sup> State Key Laboratory of Geomicrobiology and Environmental Changes, China University of Geosciences, Wuhan, Hubei 430074, China

<sup>2</sup> Faculty of Materials Science and Chemistry, China University of Geosciences, Wuhan, Hubei 430074, China

<sup>3</sup> Clinical Psychology Department, Wuhan Mental Health Center, Wuhan, Hubei Province, China

<sup>4</sup> Emergency Center, Zhongnan Hospital of Wuhan University, No. 169 Donghu Road, Wuhan, 430071, Hubei, China

<sup>5</sup> Research Institute of Petroleum Engineering, Shengli Oilfield Company, SINOPEC, Dongying 257000, China

### **Correspondence and requests for materials should be addressed to:**

Dr. Zhenli Zhu, State Key Laboratory of Biogeology and Environmental Geology, China University of Geosciences, Wuhan 430074, China, Email: zlzhu@cug.edu.cn

Dr. Baoliang Zhong, Clinical Psychology Department, Wuhan Mental Health Center, Wuhan, Hubei Province, China, Email: haizhilan@gmail.com

Dr. Jing Chen, Clinical Psychology Department, Wuhan Mental Health Center, Wuhan, Hubei Province, China, Email: jingchenphd@21cn.com

### **Table of Contents**

Fig S1. Effect of different sample matrices on the recoveries and the correction results of matrix effects by Ge internal standard. A and B correspond to the recoveries for the high dissolved

solids and organic matter without Ge internal standard correction, respectively. C and D show the results after Ge internal standardization correction. The error bars indicate the standard deviation for 11 measurement replicates. The dashed red lines indicate the bias tolerance of  $\pm 15\%$ .

Fig S2. Calibration graphs of the elements of Mn(A), Co(B), Ni(C), Cu(D), Zn(E) with Ge as internal standard. Comparison of the detection sensitivity between MUSDN-ICP-QMS and PN-ICP-QMS at an introduced mass of 1pg(F). The right axis indicates the corresponding sensitivity enhancement factors of MUSDN relative to PN.

Tab S1. Effect of different sample matrices on the recoveries and the correction results of matrix effects by Ge internal standard.

Tab S2. Measurement results of elements in digested serum CRMs.

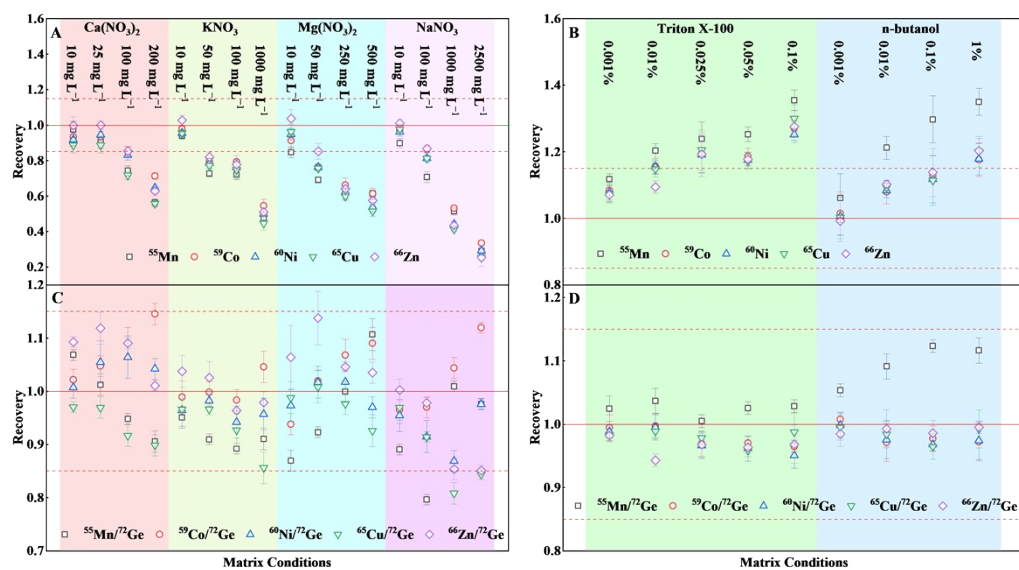

Fig S1. Effect of different sample matrices on the recovery of target analytes before and after correction with Ge internal standard. (A) High dissolved solids matrices (Ca, K, Mg, Na) without internal standard correction; (B) Organic matrices (Triton X-100, n-butanol) without internal standard correction; (C) High dissolved solids matrices with Ge internal standard correction; (D) Organic matrices with Ge internal standard correction. The dashed red lines indicate the bias tolerance of  $\pm 15\%$ . Error bars represent the standard deviation ( $n = 6$ ). Detailed numerical data (including raw and corrected recoveries with standard deviations) are provided in Tab S2.

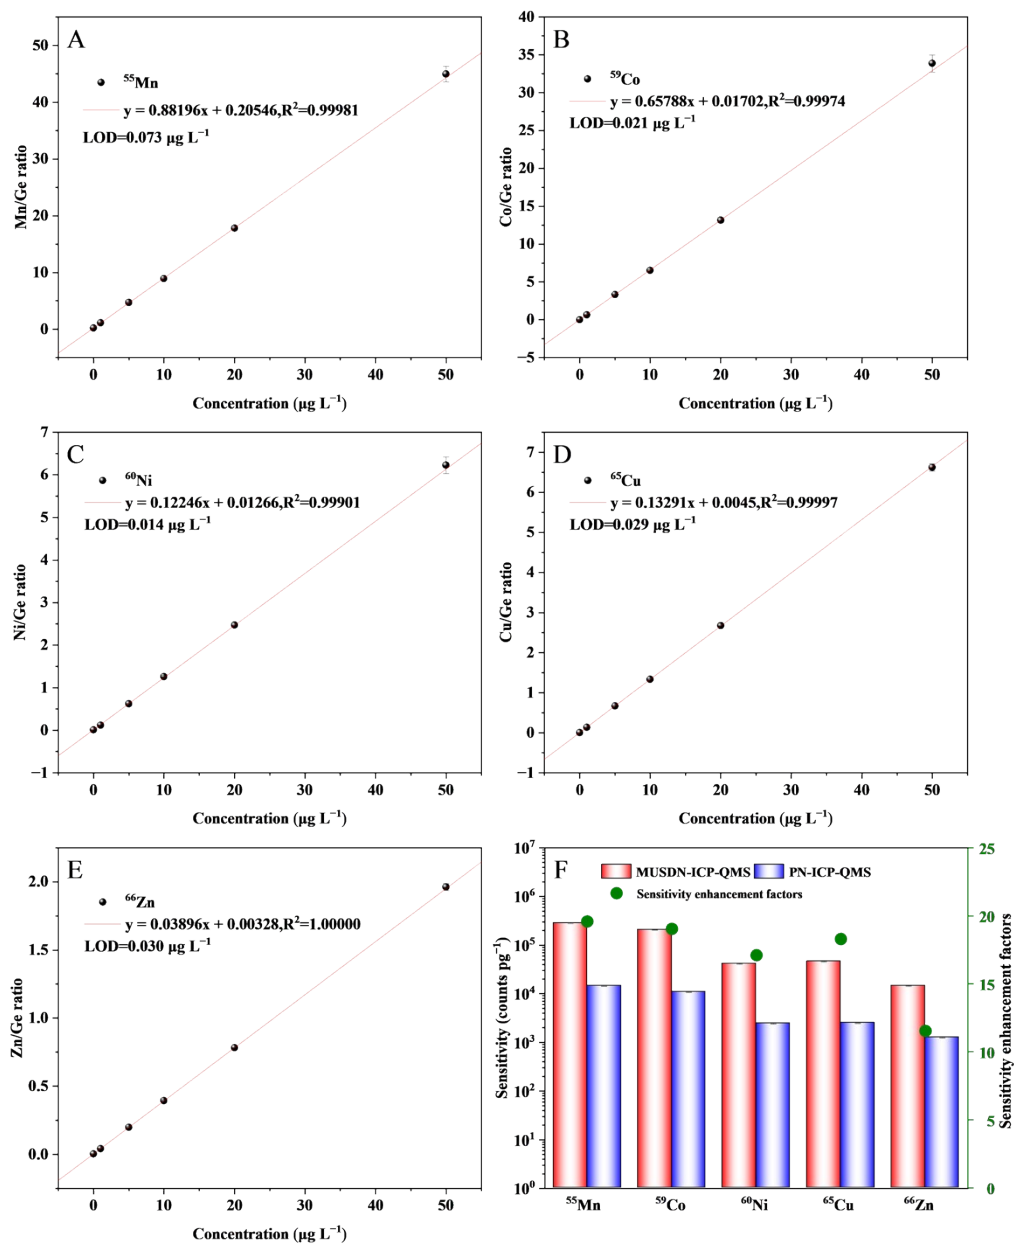

Fig S2. Calibration graphs of the elements of Mn(A), Co(B), Ni(C), Cu(D), Zn(E) with Ge as internal standard. Comparison of the detection sensitivity between MUSDN-ICP-QMS and PN-ICP-QMS at an introduced mass of 1pg(F). The right axis indicates the corresponding sensitivity enhancement factors of MUSDN relative to PN.

Tab S1. Effect of different sample matrices on the recoveries and the correction results of matrix effects by Ge internal standard.

| Matrices                   | Conc.                   | Mn        |           | Co        |           | Ni        |           | Cu        |           | Zn        |           |
|----------------------------|-------------------------|-----------|-----------|-----------|-----------|-----------|-----------|-----------|-----------|-----------|-----------|
|                            |                         | Raw       | Corr.     |
| 2% $\text{HNO}_3$          | n/a                     | 1.00      | 1.00      | 1.00      | 1.00      | 1.00      | 1.00      | 1.00      | 1.00      | 1.00      | 1.00      |
| $\text{Ca}(\text{NO}_3)_2$ | 10 mg $\text{L}^{-1}$   | 0.98±0.04 | 1.07±0.01 | 0.93±0.05 | 1.02±0.02 | 0.92±0.04 | 1.01±0.02 | 0.89±0.04 | 0.97±0.01 | 1.00±0.05 | 1.10±0.01 |
|                            | 25 mg $\text{L}^{-1}$   | 0.90±0.03 | 1.01±0.02 | 0.94±0.03 | 1.05±0.02 | 0.94±0.03 | 1.05±0.04 | 0.89±0.04 | 0.97±0.02 | 1.00±0.02 | 1.12±0.03 |
|                            | 100 mg $\text{L}^{-1}$  | 0.74±0.03 | 0.95±0.01 | 0.85±0.02 | 1.09±0.03 | 0.83±0.03 | 1.06±0.04 | 0.72±0.02 | 0.92±0.02 | 0.85±0.03 | 1.10±0.01 |
|                            | 200 mg $\text{L}^{-1}$  | 0.56±0.02 | 0.91±0.02 | 0.71±0.02 | 1.14±0.02 | 0.65±0.01 | 1.04±0.02 | 0.56±0.01 | 0.90±0.02 | 0.63±0.01 | 1.01±0.01 |
| $\text{KNO}_3$             | 10 mg $\text{L}^{-1}$   | 0.94±0.02 | 0.95±0.02 | 0.98±0.01 | 0.99±0.03 | 0.95±0.02 | 0.96±0.03 | 0.96±0.02 | 0.97±0.02 | 1.03±0.03 | 1.04±0.03 |
|                            | 50 mg $\text{L}^{-1}$   | 0.73±0.02 | 0.91±0.01 | 0.80±0.01 | 1.00±0.02 | 0.78±0.03 | 0.98±0.01 | 0.77±0.03 | 0.97±0.01 | 0.82±0.03 | 1.03±0.03 |
|                            | 100 mg $\text{L}^{-1}$  | 0.72±0.03 | 0.90±0.01 | 0.79±0.04 | 0.98±0.02 | 0.76±0.04 | 0.94±0.03 | 0.75±0.05 | 0.93±0.03 | 0.78±0.05 | 0.96±0.02 |
|                            | 1000 mg $\text{L}^{-1}$ | 0.48±0.01 | 0.91±0.02 | 0.54±0.04 | 1.04±0.03 | 0.50±0.04 | 0.96±0.03 | 0.45±0.04 | 0.86±0.03 | 0.51±0.02 | 0.98±0.02 |
| $\text{Mg}(\text{NO}_3)_2$ | 10 mg $\text{L}^{-1}$   | 0.85±0.03 | 0.87±0.02 | 0.91±0.04 | 0.94±0.02 | 0.94±0.03 | 0.97±0.03 | 0.96±0.04 | 0.99±0.03 | 1.04±0.05 | 1.06±0.06 |
|                            | 50 mg $\text{L}^{-1}$   | 0.70±0.02 | 0.92±0.01 | 0.76±0.02 | 1.02±0.02 | 0.76±0.01 | 1.02±0.03 | 0.76±0.02 | 1.01±0.03 | 0.85±0.04 | 1.14±0.05 |
|                            | 250 mg $\text{L}^{-1}$  | 0.61±0.03 | 1.00±0.02 | 0.66±0.04 | 1.07±0.03 | 0.62±0.02 | 1.02±0.00 | 0.60±0.02 | 0.98±0.02 | 0.64±0.02 | 1.04±0.01 |
|                            | 500 mg $\text{L}^{-1}$  | 0.61±0.02 | 1.11±0.03 | 0.61±0.03 | 1.09±0.03 | 0.54±0.03 | 0.97±0.02 | 0.51±0.03 | 0.92±0.03 | 0.57±0.02 | 1.03±0.02 |
| $\text{NaNO}_3$            | 10 mg $\text{L}^{-1}$   | 0.90±0.02 | 0.90±0.01 | 0.97±0.02 | 0.96±0.02 | 0.96±0.02 | 0.95±0.03 | 0.98±0.03 | 0.97±0.03 | 1.01±0.02 | 1.00±0.02 |

Tab S1 (Continued).

| Matrices          | Conc.                   | Mn        |           | Co        |           | Ni        |           | Cu        |           | Zn        |           |
|-------------------|-------------------------|-----------|-----------|-----------|-----------|-----------|-----------|-----------|-----------|-----------|-----------|
|                   |                         | Raw       | Corr.     |
| NaNO <sub>3</sub> | 100 mg L <sup>-1</sup>  | 0.71±0.03 | 0.80±0.01 | 0.86±0.02 | 0.97±0.02 | 0.81±0.01 | 0.91±0.03 | 0.81±0.02 | 0.91±0.01 | 0.87±0.02 | 0.98±0.01 |
|                   | 1000 mg L <sup>-1</sup> | 0.51±0.02 | 1.01±0.01 | 0.53±0.02 | 1.04±0.02 | 0.44±0.01 | 0.87±0.02 | 0.41±0.01 | 0.81±0.02 | 0.44±0.01 | 0.85±0.02 |
|                   | 2500 mg L <sup>-1</sup> | 0.29±0.03 | 0.98±0.01 | 0.33±0.02 | 1.12±0.01 | 0.29±0.02 | 0.98±0.01 | 0.25±0.02 | 0.84±0.01 | 0.25±0.05 | 0.85±0.01 |
| Triton X-100      | 0.001%                  | 1.12±0.02 | 1.02±0.02 | 1.08±0.03 | 0.99±0.02 | 1.07±0.03 | 0.99±0.01 | 1.07±0.02 | 0.98±0.01 | 1.07±0.02 | 0.98±0.01 |
|                   | 0.01%                   | 1.20±0.02 | 1.04±0.02 | 1.16±0.02 | 1.00±0.02 | 1.15±0.02 | 0.99±0.02 | 1.15±0.02 | 0.99±0.01 | 1.09±0.02 | 0.94±0.01 |
|                   | 0.025%                  | 1.24±0.05 | 1.00±0.01 | 1.19±0.06 | 0.97±0.02 | 1.19±0.05 | 0.97±0.02 | 1.20±0.06 | 0.98±0.01 | 1.19±0.07 | 0.96±0.02 |
|                   | 0.05%                   | 1.25±0.02 | 1.02±0.01 | 1.18±0.03 | 0.97±0.01 | 1.17±0.02 | 0.96±0.02 | 1.17±0.02 | 0.96±0.01 | 1.18±0.02 | 0.97±0.01 |
|                   | 0.1%                    | 1.35±0.03 | 1.03±0.01 | 1.27±0.02 | 0.96±0.01 | 1.25±0.02 | 0.95±0.02 | 1.30±0.04 | 0.99±0.03 | 1.28±0.05 | 0.96±0.03 |
| n-butanol         | 0.001%                  | 1.06±0.07 | 1.05±0.01 | 1.01±0.06 | 1.01±0.01 | 1.01±0.06 | 1.00±0.02 | 1.00±0.06 | 1.00±0.02 | 0.99±0.06 | 0.98±0.02 |
|                   | 0.01%                   | 1.21±0.03 | 1.09±0.02 | 1.07±0.04 | 0.97±0.03 | 1.08±0.02 | 0.98±0.03 | 1.10±0.02 | 0.98±0.02 | 1.10±0.01 | 0.99±0.03 |
|                   | 0.1%                    | 1.30±0.07 | 1.12±0.01 | 1.13±0.08 | 0.98±0.02 | 1.12±0.07 | 0.97±0.01 | 1.11±0.07 | 0.96±0.02 | 1.14±0.07 | 0.98±0.02 |
|                   | 1%                      | 1.35±0.04 | 1.12±0.02 | 1.18±0.05 | 0.97±0.03 | 1.18±0.05 | 0.97±0.03 | 1.20±0.04 | 0.99±0.03 | 1.20±0.04 | 1.00±0.01 |

Note: Values are presented as mean ± SD (n = 6). Raw recovery = (analyte signal in sample matrix / analyte signal in 2%HNO<sub>3</sub>). Corrected recovery = [(analyte / Ge) signal in sample matrix] / [(analyte / Ge) signal in 2%HNO<sub>3</sub>]. n/a: not applicable (reference matrix). Conc.: concentration.

Tab S2. Measurement results of elements in digested serum CRMs.

| Sample name             | Parameter                   | Mn     | Co     | Ni     | Cu    | Zn    |
|-------------------------|-----------------------------|--------|--------|--------|-------|-------|
| Seronorm™ trace-element | Reference                   | 10.1 ± | 1.04 ± | 5.28 ± | 1050  | 1390  |
| Serum L-1 (n = 3)       | value (µg L <sup>-1</sup> ) | 2.0    | 0.21   | 1.06   | ± 211 | ± 280 |
|                         | Measured                    | 9.30 ± | 1.09 ± | 5.51 ± | 988 ± | 1230  |
|                         | value (µg L <sup>-1</sup> ) | 0.09   | 0.03   | 0.16   | 22    | ± 29  |
| Seronorm™ trace-element | Reference                   | 14.8 ± | 3.03 ± | 9.7 ±  | 1961  | 1940  |
| Serum L-2 (n = 3)       | value (µg L <sup>-1</sup> ) | 2.4    | 0.43   | 1.4    | ± 239 | ± 270 |
|                         | Measured                    | 13.5 ± | 3.32 ± | 10.3 ± | 1840  | 1920  |
|                         | value (µg L <sup>-1</sup> ) | 0.2    | 0.07   | 0.7    | ± 17  | ± 127 |
